# Supplementary material
Source: PubMed Central journal article supplement (PMC2837120)

**Comparative Effects of Two Gingerol-Containing *Zingiber officinale* Extracts on  
Experimental Rheumatoid Arthritis<sup>1</sup>**

Janet L. Funk<sup>†\*</sup>, Jennifer B. Frye<sup>†</sup>, Janice N. Oyarzo<sup>†</sup>, and Barbara N.  
Timmermann<sup>‡</sup>

*Department of Medicine, University of Arizona, Tucson, AZ 85724, and  
Department of Medicinal Chemistry, School of Pharmacy, University of Kansas,  
Lawrence, KS 66045*

**SUPPORTING INFORMATION**

<sup>1</sup> Dedicated to Dr. David G.I. Kingston of Virginia Polytechnic Institute and State University for his pioneering work on bioactive natural products.

\* Author to whom correspondence should be addressed. Tel(:) (520) 626-3242. Fax(:) (520) 626-1106. Email(:) [jfunk@u.arizona.edu](mailto:jfunk@u.arizona.edu).

<sup>†</sup>University of Arizona.

<sup>‡</sup>University of Kansas.

## Figure

S1. HPLC Chromatograms (210nm) of (A) crude ginger dichloromethane (DCM) extract and (B) extract containing only gingerols and their derivative (gingerol fraction) demonstrating [6]-,[8]-,[10]-gingerols (**1**, **2**, **3**) and 6-shogaol (**4**) common to both extracts, as well as depletion of essential oils in sample (B).

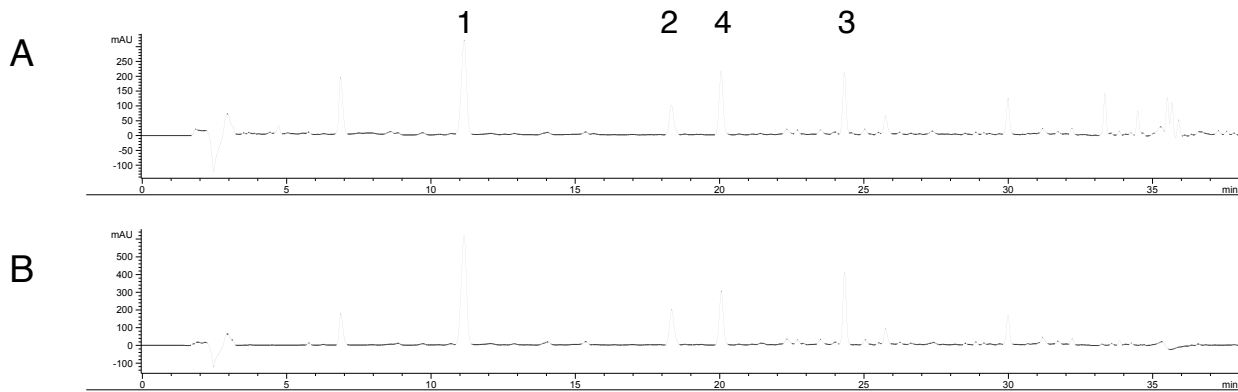

Supplement: NIHMS140477-supplement-supplement_1.pdf [file NIHMS140477-supplement-supplement_1.pdf]
